# Supplementary material for: Binding of isoquinoline alkaloids berberine, palmatine and coralyne to hemoglobin: structural and thermodynamic characterization studies
Source: Royal Society of Chemistry journal article supplement (doi:10.1039/c2mb25345c), 2012-10-19
Supplement: c2mb25345c.pdf [file c2mb25345c.pdf]

**REVISED MANUSCRIPT ID MB-ART-08-2012-025345**

**ELECTRONIC SUPPLEMENTARY INFORMATION**

**Binding of isoquinoline alkaloids berberine, palmatine and coralyne to hemoglobin: Structural and thermodynamic characterization studies**

Soumitra Hazra, Maidul Hossain<sup>s</sup> and Gopinatha Suresh Kumar\*

*Biophysical Chemistry Laboratory  
CSIR- Indian Institute of Chemical Biology  
Kolkata 700 032, India*

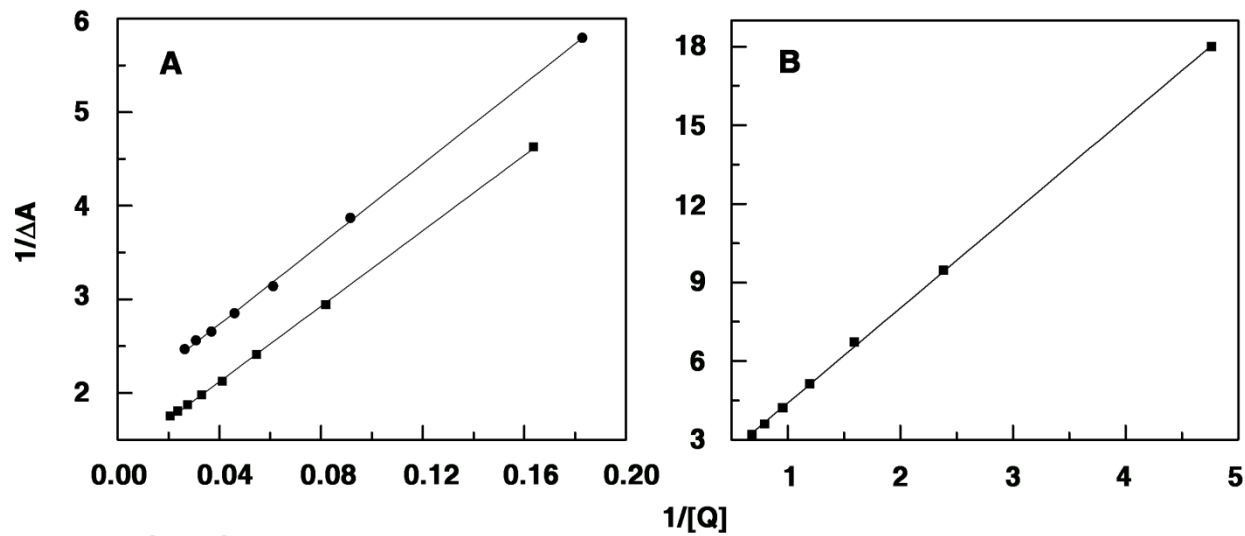

Fig. S1, ESI

**Fig. S1** Representative Benesi-Hildebrand plots for binding of Hb with (A) berberine (■), palmatine (●) and (B) coralyne.

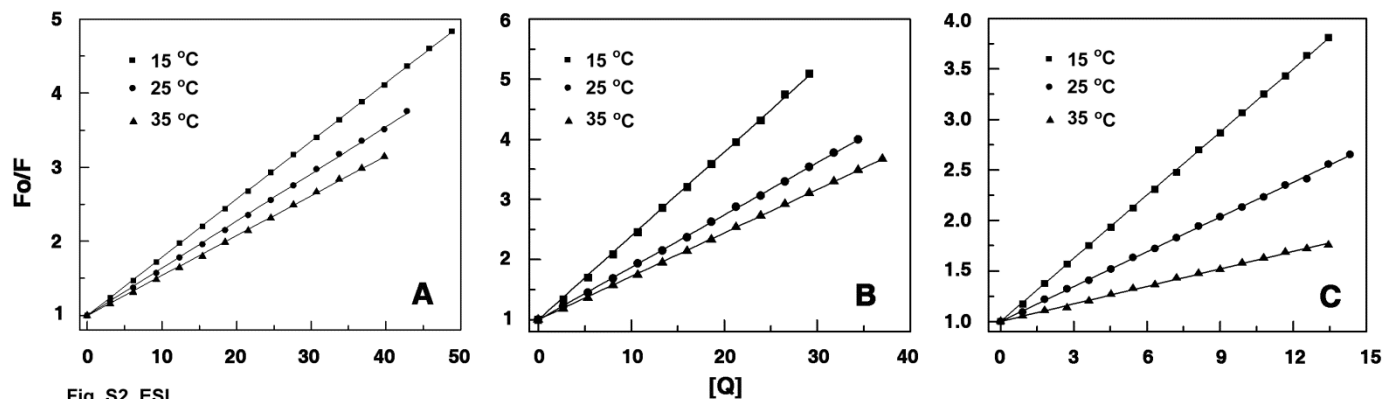

**Fig. S2** Stern-Volmer plots for the quenching of Hb fluorescence by (A) Berberine, (B) palmatine and (C) coralyne at different temperatures.

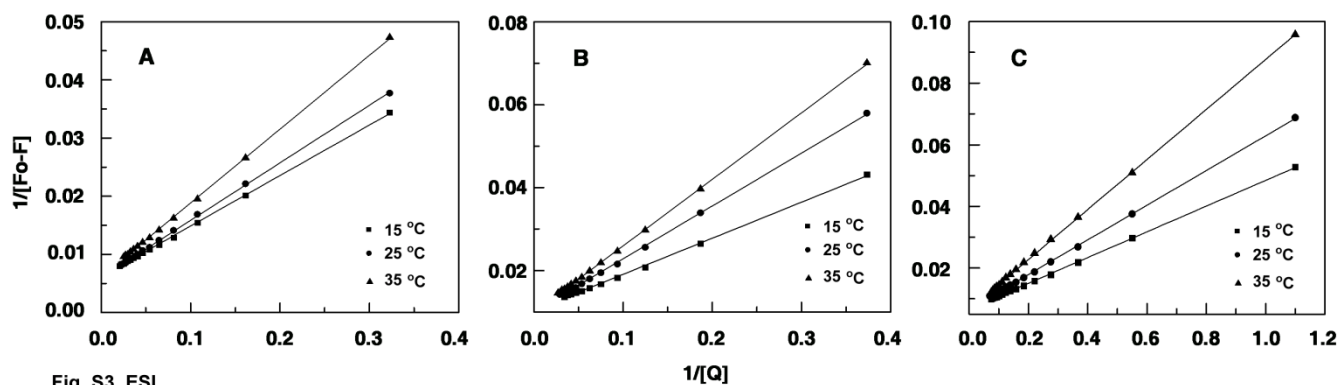

Fig. S3, ESI

**Fig. S3** Lineweaver-Burk plots for the quenching of Hb fluorescence by (A) Berberine, (B) palmatine and (C) coralyne at different temperatures.

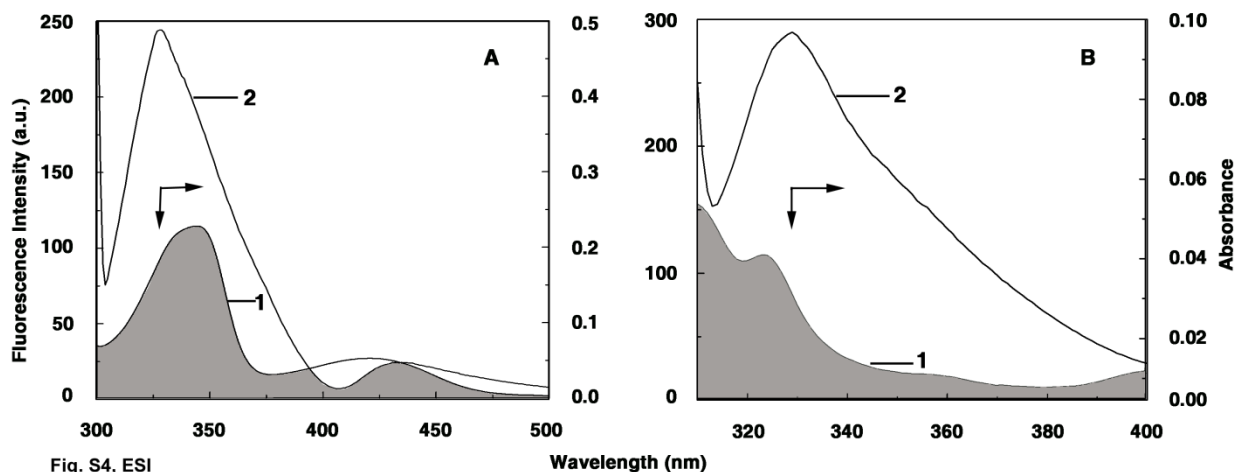

**Fig. S4** Overlap (shaded portion) of Hb fluorescence spectrum and absorption spectra of (A) berberine and (B) coralyne. In panel (A) and (B) curve 1 represent absorption spectra of (A) berberine and (B) coralyne and curve 2 represent the fluorescence spectrum of Hb. The excitation of Hb was done at 295 nm. The ratio of the concentration of [Hb]:[alkaloids] = 1:1.

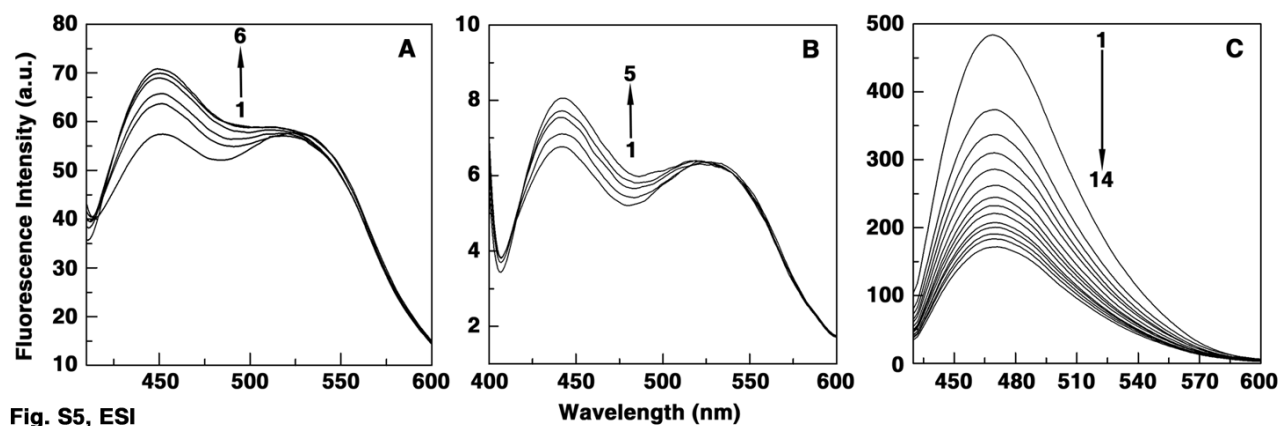

Fig. S5, ESI

**Fig. S5** DSC thermograms of Hb and Hb-alkaloids complex. In panel (A), (B) and (C) curve 1 and curve 2 represents for Hb and Hb-alkaloids complex. Inset thermal melting profiles for Hb and Hb-alkaloid complexes.

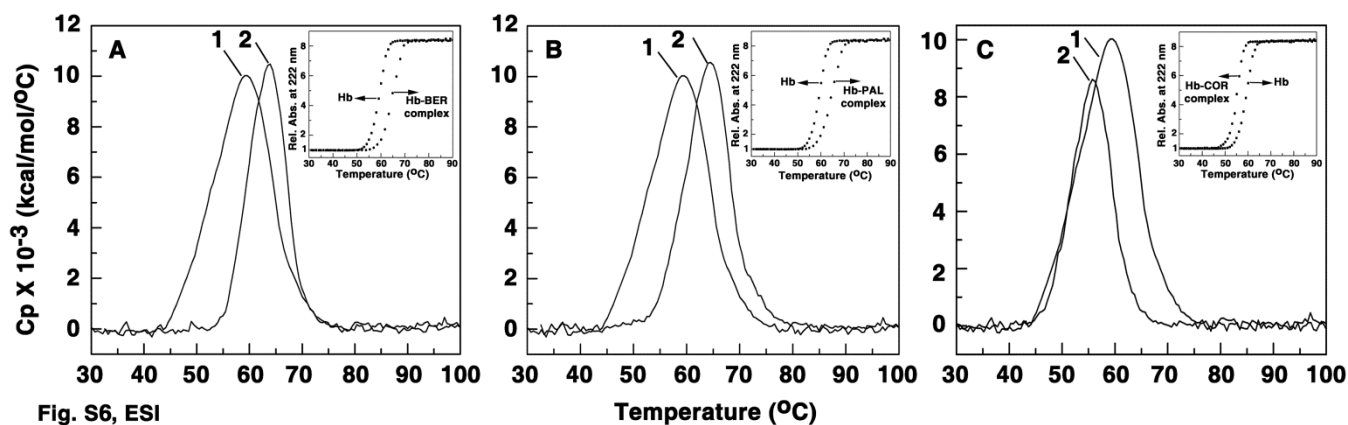

**Fig. S6** Representative fluorescence spectra of (A) berberine (10 μM, curve 1-6) with 0, 0.98, 1.96, 2.94, 3.92, 4.90 μM of Hb, (B) palmatine (5 μM, curve 1-5) with 0, 0.98, 1.96, 2.94, 3.92 μM of Hb and (C) coralyne (0.1 μM, curve 1-15) with 0, 0.15, 0.30, 0.44, 0.59, 0.74, 0.89, 1.03, 1.18, 1.32, 1.47, 1.61, 1.76, 1.90 μM of Hb.

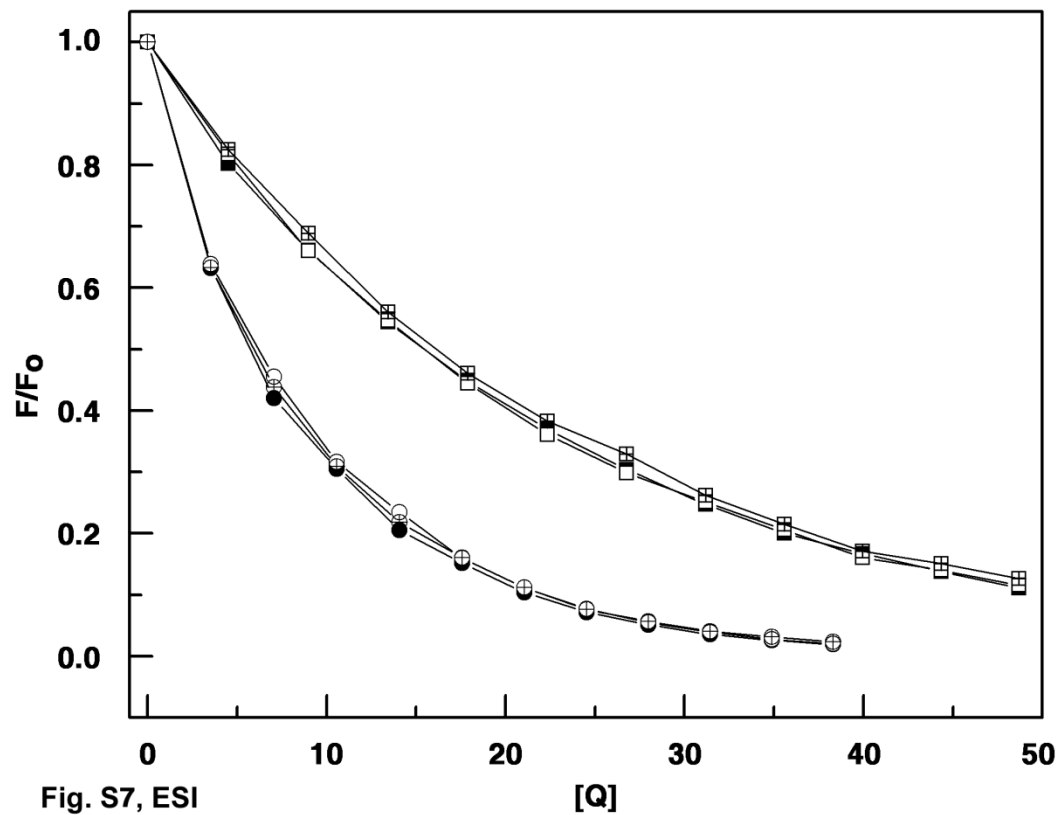

**Fig. S7** Displacement study of hydrophobic probe ANS bound to Hb by the alkaloids.

Plots of  $F/F_o$  versus  $[Q]$  of palmatine and coralyne with Hb (■,●), Hb-ANS (1:1) complex (□,○) and Hb-ANS (1:5) (cross symbol) complex.
